# Supplementary material
Source: PubMed Central journal article supplement (PMC2744375)
Supplement: NIHMS91986-supplement-figures.pdf [file NIHMS91986-supplement-figures.pdf]

**A**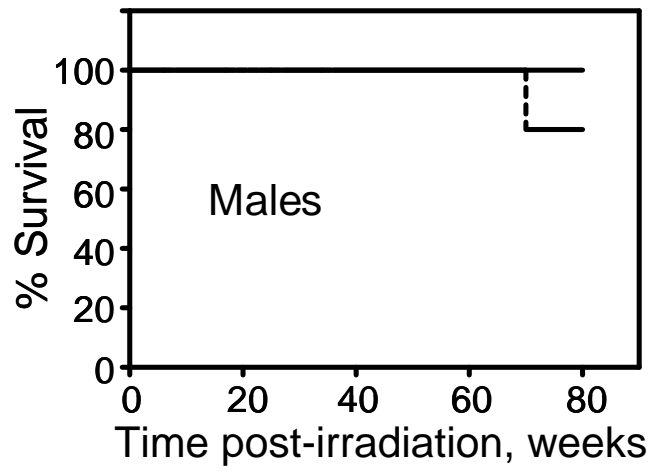**B**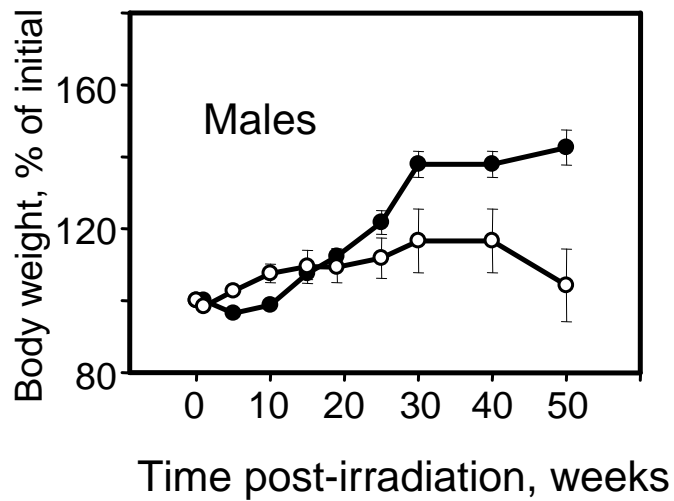

## Supplementary Fig. 1

Survival rate and body weight loss in WT and *Clock/Clock* males after 4Gy of TBI

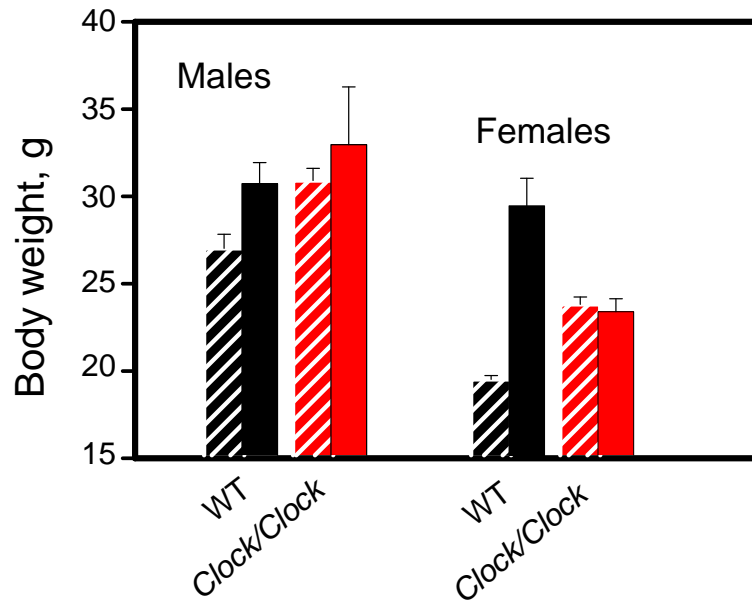

Supplementary Fig.2

Body weight of WT and *Clock/Clock* mice after 80 weeks of TBI. WT- black bars, *Clock/Clock* – red bars; untreated mice at 12-14 weeks of age – hatched bars; same mice 80 weeks post irradiation – closed bars.

**A**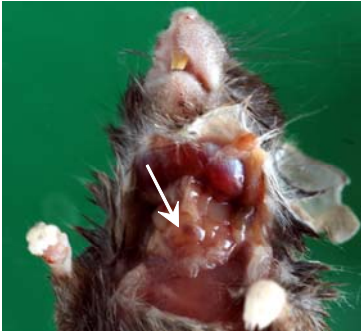**B**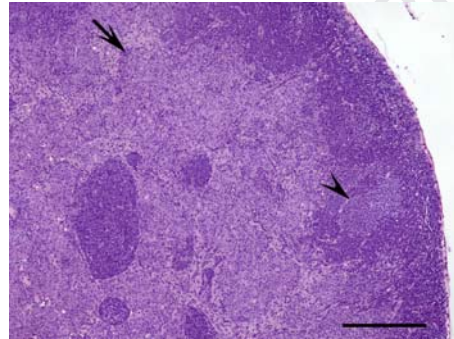

Supplementary Fig. 3. Reactive hyperplasia of mandibular lymph nodes in *Clock/Clock* female mice. A – mandibular lymph nodes, gross appearance; an arrow indicates lymph node; B – plasmacytosis in the medullar (arrow) and secondary follicle (arrowhead) in the peripheral cortex of the lymph node. Hematoxylin and eosin, Calibration bar, 200  $\mu$ m.

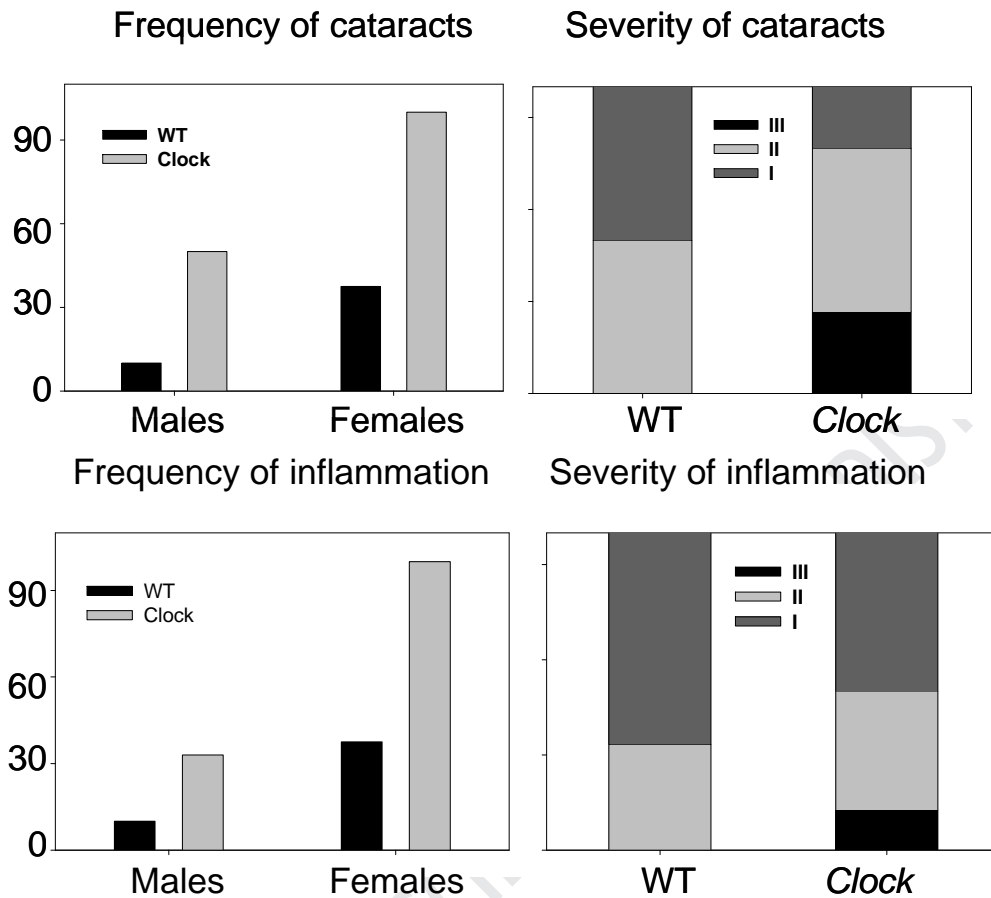

Supplementary Fig. 4. Frequency and severity of cataracts and eye Inflammation in WT and Clock/Clock mice after 80 weeks of TBI. The following criteria were used for grading. Cataracts: grade I – minor changes that can be detected by histological examination only; grade II – opacity can be observed by gross examination and moderate changes can be detected by histological examination; grade III – significant opacity can be observed by gross examination and major histological changes in the structure of lens. The examination had been done independently by two investigators, who had no knowledge of animal genotype and treatment before examination.

Supplementary Table 1. Whole blood cell counts (WBC) and WBC differentials in WT and *Clock/Clock* female mice after 66-68 weeks of low-dose TBI. RBC – red blood cells, WBC – white blood cells, Neut – neutrophils, Lymph – lymphocytes, Mono – monocytes, Eosin – eosinophils, Baso – basophils, LUC – large unstained cells. Blood samples were analyzed using an Advia 120 hematology system with software application for C57BL/6J mice.

|              | RBC, x 10 <sup>6</sup> | WBC, x 10 <sup>3</sup> | Neut, %   | Lymph, %  | Mono, %  | Eosin, % | Baso, % | LUC, %  |
|--------------|------------------------|------------------------|-----------|-----------|----------|----------|---------|---------|
| WT           | 7.0±1.2                | 6.4±5.9                | 22.5±13.5 | 66.7±14.5 | 3.3±2.4  | 2.8±1.4  | 0.7±0.3 | 4.1±2.2 |
| <i>Cl/Cl</i> | 7.2±0.9                | 7.8±3.0                | 15.0±5.6  | 73.2±9.0  | 4.25±2.7 | 3.6±2.3  | 0.5±0.4 | 3.5±2.8 |

©2008 LANDES BIOSCIENCE. DO NOT DISTRIBUTE.

Supplementary Table 2. Cell cycle-related genes that are up- or down-regulated in spleens of *Clock/Clock* mice

| UniGene   | RefSeq    | Symbol  | Down-regulated in <i>Clock/Clock</i> | Description                                                                                                                                                                                                                                                         |
|-----------|-----------|---------|--------------------------------------|---------------------------------------------------------------------------------------------------------------------------------------------------------------------------------------------------------------------------------------------------------------------|
| Mm.260114 | NM_172301 | Ccnb1   | <b>0.77</b>                          | Cyclin B1, essential for the control of the cell cycle at the G2/M (mitosis) transition                                                                                                                                                                             |
| Mm.22592  | NM_007630 | Ccnb2   | <b>0.78</b>                          | Cyclin B2                                                                                                                                                                                                                                                           |
| Mm.307103 | NM_007658 | Cdc25a  | <b>0.78</b>                          | Cell division cycle 25 homolog A ( <i>S. pombe</i> ). Tyrosine protein phosphatase which functions as a dosage-dependent inducer of mitotic progression.                                                                                                            |
| Mm.42201  | NM_008316 | Hus1    | <b>0.55</b>                          | Component of the 9-1-1 cell-cycle checkpoint response complex                                                                                                                                                                                                       |
| Mm.287173 | NM_009516 | Wee1    | <b>0.60</b>                          | Cell cycle regulator                                                                                                                                                                                                                                                |
|           |           |         | Up-regulated in <i>Clock/Clock</i>   |                                                                                                                                                                                                                                                                     |
| Mm.273049 | NM_007631 | Ccnd1   | <b>1.38</b>                          | Cyclin D1                                                                                                                                                                                                                                                           |
| Mm.195663 | NM_007669 | Cdkn1a  | <b>1.49</b>                          | Cyclin-dependent kinase inhibitor, p21, inhibitor of cell proliferation                                                                                                                                                                                             |
| Mm.16753  | NM_007691 | Chek1   | <b>1.41</b>                          | Serine/threonine-protein kinase Chk, required for checkpoint mediated cell cycle arrest in response to DNA damage. May also negatively regulate cell cycle progression                                                                                              |
| Mm.389750 | NM_007836 | Gadd45a | <b>1.31</b>                          | Growth arrest and DNA-damage-inducible protein                                                                                                                                                                                                                      |
| Mm.1100   | NM_010564 | Inha    | <b>2.20</b>                          | Inhibins/activins are involved in regulating a number of diverse functions such as hypothalamic and pituitary hormone secretion, gonadal hormone secretion, germ cell development and maturation, erythroid differentiation, insulin secretion, nerve cell survival |
| Mm.347749 | NM_181345 | Npm2    | <b>2.45</b>                          | Nucleoplasmin-2, regulation of exit from mitosis                                                                                                                                                                                                                    |
| Mm.1237   | NM_008885 | Pmp22   | <b>1.91</b>                          | Peripheral myelin protein 22, growth arrest-specific 3                                                                                                                                                                                                              |
| Mm.235580 | NM_011250 | Rbl2    | <b>1.72</b>                          | Retinoblastoma-like protein 2, key regulator of entry into cell division. May act as a tumor suppressor                                                                                                                                                             |
| Mm.20894  | NM_011641 | Trp63   | <b>1.56</b>                          | Acts as a sequence specific DNA binding transcriptional activator or repressor. May be required in conjunction with TP73/p73 for initiation of TP53/p53 dependent apoptosis in response to genotoxic stress                                                         |

Supplementary Table 3. Apoptosis-related genes that are up-regulated in spleens of *Clock/Clock* mice

| UniGene   | RefSeq    | Symbol   | Up-regulated in <i>Clock/Clock</i> | Description                                                                                                                                    |
|-----------|-----------|----------|------------------------------------|------------------------------------------------------------------------------------------------------------------------------------------------|
| Mm.220289 | NM_009684 | Apaf1    | <b>1.54</b>                        | Apoptotic peptidase activating factor 1                                                                                                        |
| Mm.2443   | NM_007523 | Bak1     | <b>2.01</b>                        | BCL2-antagonist/killer 1                                                                                                                       |
| Mm.89961  | NM_010872 | Birc1b   | <b>1.54</b>                        | Baculoviral IAP repeat-containing 1b                                                                                                           |
| Mm.335659 | NM_007465 | Birc2    | <b>2.03</b>                        | Baculoviral IAP repeat-containing 2                                                                                                            |
| Mm.2026   | NM_007464 | Birc3    | <b>1.49</b>                        | Baculoviral IAP repeat-containing 3                                                                                                            |
| Mm.34405  | NM_009810 | Casp3    | <b>4.52</b>                        | Caspase 3                                                                                                                                      |
| Mm.24103  | NM_029653 | Dapk1    | <b>2.04</b>                        | Death associated protein kinase 1                                                                                                              |
| Mm.24163  | NM_023258 | Pycard   | <b>2.35</b>                        | PYD and CARD domain containing, positive regulation of caspase activity                                                                        |
| Mm.287450 | NM_173378 | Trp53bp2 | <b>1.60</b>                        | Transformation related protein 53 binding protein 2; response to ionizing radiation, negative regulation of progression through the cell cycle |
| Mm.20894  | NM_011641 | Trp63    | <b>2.58</b>                        | Transformation related protein 63                                                                                                              |
| Mm.78015  | NM_011642 | Trp73    | <b>2.41</b>                        | Transformation related protein 73                                                                                                              |
